# Supplementary material for: How innocent is thallium(i)? Corrected formulations of [Tl2Pd14(CO)9(PMe3)11][PF6]2 and [TlPd9(CO)9(PPh3)6][PF6] clusters previously reported as corresponding Au2Pd14 and AuPd9 clusters
Source: Royal Society of Chemistry journal article supplement (doi:10.1039/c2cc37959g), 2012-12-14
Supplement: c2cc37959g.pdf [file c2cc37959g.pdf]

## Electronic Supplementary Information

### **How Innocent Is Thallium(I)? Correct Formulations of $[\text{Tl}_2\text{Pd}_{14}(\text{CO})_9(\text{PMe}_3)_{11}][\text{PF}_6]_2$ and $[\text{TlPd}_9(\text{CO})_9(\text{PPh}_3)_6][\text{PF}_6]$ Clusters Previously Reported as Corresponding $\text{Au}_2\text{Pd}_{14}$ and $\text{AuPd}_9$ Clusters**

*Evgueni G. Mednikov<sup>a</sup> and Lawrence F. Dahl<sup>a</sup>*

Department of Chemistry, University of Wisconsin-Madison, Madison, WI 53706, USA  
E-mail: [mednikov@chem.wisc.edu](mailto:mednikov@chem.wisc.edu); [dahl@chem.wisc.edu](mailto:dahl@chem.wisc.edu)

#### **Experimental part.**

**General Remarks.**  $\text{Pd}_{10}(\text{CO})_{12}(\text{PMe}_3)_6$  was obtained in accordance with the approach developed for  $\text{Pd}_{10}(\text{CO})_{12}(\text{PAlk}_3)_6$  clusters<sup>1a</sup> and recrystallized from  $\text{CH}_2\text{Cl}_2$ /heptane.  $\text{Pd}_{10}(\text{CO})_{12}(\text{PPh}_3)_6$  was obtained from the literature method<sup>1b</sup> and recrystallized from  $\text{CHCl}_3$ /hexane.  $[(\text{Ph}_3\text{P})_2\text{N}]\text{Cl}$  was recrystallized from acetone/*i*-Pr<sub>2</sub>O. All other reagents were used without additional purification, but before use solvents were purged with nitrogen for at least 20 min. All operations except crystallization of  $[\text{TlPd}_9(\text{CO})_9(\text{PPh}_3)_6][\text{PF}_6]$  were performed under N<sub>2</sub>. <sup>31</sup>P{<sup>1</sup>H} NMR spectra were obtained on Bruker AC-300 spectrometer and referenced to 85% H<sub>3</sub>PO<sub>4</sub> in D<sub>2</sub>O as an external standard. IR spectra were recorded on Bruker Tensor 27 FT-IR spectrometer. X-Ray diffraction data collections were performed on Bruker APEX2 area-detector diffractometer (Mo K $\alpha$  radiation,  $\lambda = 0.71073 \text{ \AA}$ ).

#### **X-Ray Crystallographic Determinations of $[\text{Tl}_2\text{Pd}_{14}(\mu_2\text{-CO})_2(\mu_3\text{-CO})_7(\text{PMe}_3)_{11}][\text{PF}_6]_2 \cdot \text{Me}_2\text{CO}$ [(1a-Me)·Me<sub>2</sub>CO] and $[\text{TlPd}_9(\text{CO})_9(\text{PPh}_3)_6][\text{PF}_6] \cdot 1.65\text{THF} \cdot 0.66\text{CH}_2\text{Cl}_2$ (2a-Ph).**

X-Ray data for crystals (1a-Me)·Me<sub>2</sub>CO and 2a-Ph were collected at 100(2) K; reflections from both crystals were empirically corrected for absorption (SADABS).<sup>2a</sup> The crystal structures were obtained by use of direct methods followed by difference Fourier maps. Least-squares refinements (based on F<sup>2</sup>) were carried out with SHELXTL.<sup>2a, b</sup>

In the crystal structure of **(1a-Me)·Me<sub>2</sub>CO** one of two [PF<sub>6</sub>]<sup>-</sup> anions and the methyl groups attached to P3, P6, and P8 atoms are disordered over two sites with refined occupancy factors of 0.60/0.40, 0.51/0.49, 0.71/0.29 and 0.61/0.39, respectively. All non-hydrogen atoms with the exception of most of those that are disordered were refined anisotropically.

In the crystal structure of **2a-Ph** the crystallographically independent part of the unit cell contains: (a) one-third of the [Pd<sub>9</sub>Tl(CO)<sub>9</sub>(PPh<sub>3</sub>)<sub>6</sub>][PF<sub>6</sub>]; and (b) THF and CH<sub>2</sub>Cl<sub>2</sub> solvent molecules that are disordered over the same site with the refined partial occupancies of 0.55 and 0.22, respectively. The [PF<sub>6</sub>]<sup>-</sup> anion is disordered around crystallographic threefold axis at two independent positions (the refined s.o.f. 0.56/0.44) giving rise to six different orientations of [PF<sub>6</sub>]<sup>-</sup>. All non-hydrogen atoms with the exception of the Cl (of CH<sub>2</sub>Cl<sub>2</sub>), F (of [PF<sub>6</sub>]<sup>-</sup>), and C and O atoms of solvent molecules were refined anisotropically. A rigid-group constraint (AFIX 66) was applied to all phenyl groups. EADP constraints were used for the F atoms of the disordered [PF<sub>6</sub>]<sup>-</sup> anion and the Cl, C and O atoms of the solvent molecules. Distance restraints were applied to the P-F bonds, to disordered Ph groups, and to the Cl, C, and O atoms of the solvent molecules.

In both structures the hydrogen atoms were generated geometrically and refined as riding atoms with corresponding default C-H distances. Structural CIF/PLATON tests performed by the <http://journals.iucr.org/services/cif/checking/checkform.html> are in accordance with the crystal structure determinations. CCDC reference numbers are 906532 [**(1a-Me)·Me<sub>2</sub>CO**] and 906531 (**2a-Ph**).

## References

1. (a) E. G. Mednikov and N. K. Eremenko, *Koordin. Khim. (Sov. J. Coord. Chem.)* 1983, **9**, 243;  
(b) E. G. Mednikov, N. K. Eremenko and S. P. Gubin, *Koordin. Khim. (Sov. J. Coord. Chem.)* 1984, **10**, 711.

2. (a) G. M. Sheldrick, SHELXTL (version 6.10 (2000)) program library, Bruker Analytical X-Ray Systems, Madison, WI; (b) Bruker-AXS. 2009. Apex2 v2010.7-0, Bruker-AXS Inc., Madison, Wisconsin, USA.

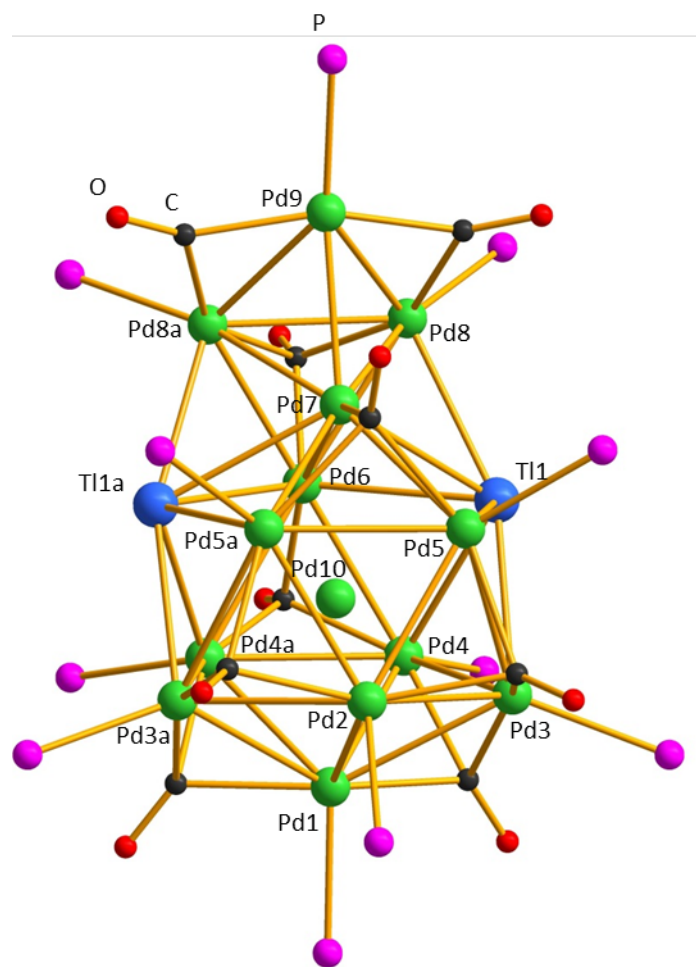

**Fig. S1** Entire  $[\text{Tl}_2\text{Pd}_{14}(\text{CO})_9(\text{PMe}_3)_{11}]^{2+}$  dication **1a-Me** of *pseudo*- $C_s$  symmetry without Me-substituents.

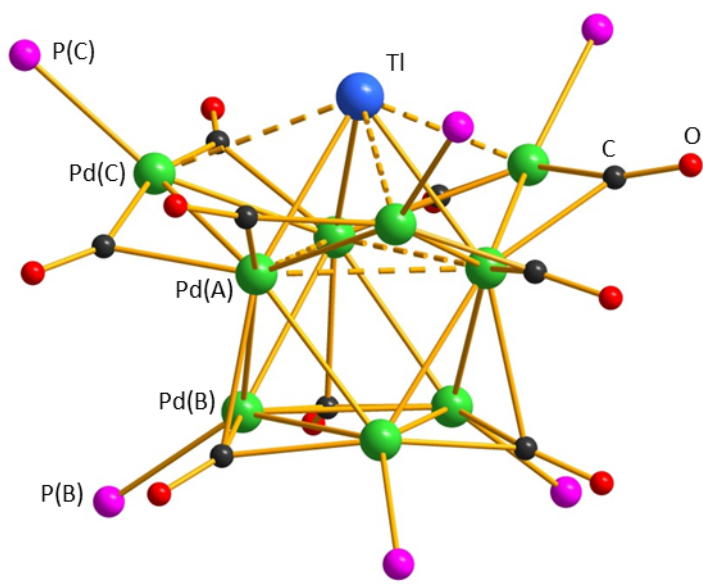

**Fig. S2** Entire view of the  $[\text{TlPd}_9(\text{CO})_9(\text{PPh}_3)_6]^+$  cluster cation **2a-Ph** of  $C_{3v}$  symmetry without Ph-substituents .

**Table S1.** Comparative Means (Å) and Individual Ranges (Å) under *Pseudo-C<sub>s</sub>* Symmetry between the  $\text{Tl}_2\text{Pd}_{14}(\text{CO})_9\text{P}_{11}$  Fragment of  $[\text{Tl}_2\text{Pd}_{14}(\mu_2\text{-CO})_2(\mu_3\text{-CO})_7(\text{PMe}_3)_{11}][\text{PF}_6]_2 \cdot \text{Me}_2\text{CO}$  [(**1a-Me**)·**Me<sub>2</sub>CO**] and Corresponding Crystallographic-*C<sub>s</sub>* Fragment of the non-Solvated  $[\text{Au}_2\text{Pd}_{14}(\text{CO})_9(\text{PMe}_3)_{11}][\text{PF}_6]_2$  (**1-Me**)<sup>a</sup> Relabeled as  $[\text{Tl}_2\text{Pd}_{14}(\text{CO})_9(\text{PMe}_3)_{11}][\text{PF}_6]_2$ .

| Connectivity                                          | N <sup>b</sup> | Mean [Range] in ( <b>1a-Me</b> )· <b>Me<sub>2</sub>CO</b> <sup>c</sup> | Mean [Range] in <b>1-Me</b> <sup>a,d,e</sup> |
|-------------------------------------------------------|----------------|------------------------------------------------------------------------|----------------------------------------------|
| Radial in $\text{Tl}_2\text{Pd}_{11}$ icosahedron     |                |                                                                        |                                              |
| Pd(cent)-Tl                                           | 2              | 2.839 [2.8370(5)-2.8405(5)]                                            | 2.853(2) [2.853(2)]                          |
| Pd(cent)-Pd(1)                                        | 1              | 2.6883(4)                                                              | 2.678(5)                                     |
| Pd(cent)-Pd(2)                                        | 1              | 2.6415(4)                                                              | 2.649(5)                                     |
| Pd(cent)-Pd(3)                                        | 2              | 2.824 [2.8144(6)-2.8342(6)]                                            | 2.826(4) [2.826(3)]                          |
| Pd(cent)-Pd(4)                                        | 2              | 2.740 [2.7357(5)-2.7448(5)]                                            | 2.757(4) [2.757(4)]                          |
| Pd(cent)-Pd(5)                                        | 2              | 2.755 [2.7521(5)-2.7580(5)]                                            | 2.759(4) [2.759(4)]                          |
| Pd(cent)-Pd(6)                                        | 1              | 2.7571(4)                                                              | 2.777(5)                                     |
| Pd(cent)-Pd(7)                                        | 1              | 2.7416(4)                                                              | 2.747(5)                                     |
| Mean [Range] for Pd-Pd                                |                | 2.747 [2.6415(4)-2.8342(6)]                                            | 2.754 [2.649(5)-2.826(3)]                    |
|                                                       |                |                                                                        |                                              |
| Tangential in $\text{Tl}_2\text{Pd}_{11}$ icosahedron |                |                                                                        |                                              |
| Tl-Pd(3)                                              | 2              | 2.960 [2.9487(5)-2.9712(5)]                                            | 2.967(3) [2.967(3)]                          |
| Tl-Pd(4)                                              | 2              | 2.884 [2.8707(5)-2.8975(4)]                                            | 2.911(3) [2.911(3)]                          |
| Tl-Pd(5)                                              | 2              | 2.918 [2.8988(5)-2.9370(5)]                                            | 2.914(3) [2.914(3)]                          |
| Tl-Pd(6)                                              | 2              | 2.963 [2.9625(5)-2.9635(5)]                                            | 2.985(2) [2.985(2)]                          |
| Tl-Pd(7)                                              | 2              | 2.970 [2.9695(5)-2.9706(5)]                                            | 2.966(2) [2.966(2)]                          |
| Mean [Range] for Tl-Pd                                |                | 2.939 [2.8707(5)-2.9712(5)]                                            | 2.949 [2.911(3)-2.985(2)]                    |
| Pd(1)-Pd(2)                                           | 1              | 3.0187(4)                                                              | 3.008(4)                                     |

|                                                                 |   |                             |                           |
|-----------------------------------------------------------------|---|-----------------------------|---------------------------|
| Pd(1)-Pd(3)                                                     | 2 | 2.928 [2.9185(6)-2.9370(6)] | 2.914(3) [2.914(3)]       |
| Pd(1)-Pd(4)                                                     | 2 | 2.831 [2.8267(6)-2.8347(6)] | 2.850(4) [2.850(4)]       |
| Pd(2)-Pd(3)                                                     | 2 | 2.900 [2.8798(6)-2.9199(6)] | 2.919(4) [2.919(4)]       |
| Pd(2)-Pd(5)                                                     | 2 | 2.805 [2.7985(6)-2.8112(6)] | 2.820(4) [2.820(4)]       |
| Pd(3)-Pd(4)                                                     | 2 | 2.999 [2.9979(6)-2.9992(6)] | 3.000(4) [3.000(4)]       |
| Pd(3)-Pd(5)                                                     | 2 | 2.986 [2.9803(6)-2.9909(6)] | 3.012(4) [3.012(4)]       |
| Pd(4)-Pd(4A)                                                    | 1 | 2.8386(4)                   | 2.845(5)                  |
| Pd(4)-Pd(6)                                                     | 2 | 2.804 [2.8004(6)-2.8081(6)] | 2.810(4) [2.810(4)]       |
| Pd(5)-Pd(5A)                                                    | 1 | 2.8674(4)                   | 2.864(5)                  |
| Pd(5)-Pd(7)                                                     | 2 | 2.818 [2.8024(5)-2.8332(5)] | 2.825(4) [2.825(4)]       |
| Pd(6)-Pd(7)                                                     | 1 | 2.9028(4)                   | 2.901(4)                  |
| Mean [Range] for Pd-Pd                                          |   | 2.888 [2.7985(6)-3.0187(4)] | 2.896 [2.810(4)-3.012(4)] |
|                                                                 |   |                             |                           |
| Between $Tl_2Pd_{11}$ icosahedron and $Pd_5$ trigonal bipyramid |   |                             |                           |
| Tl-Pd(8)                                                        | 2 | 2.903 [2.8762(5)-2.9303(5)] | 2.919(2) [2.919(2)]       |
| Pd(6)-Pd(8)                                                     | 2 | 2.755 [2.7477(6)-2.7625(5)] | 2.765(4) [2.765(4)]       |
| Pd(7)-Pd(8)                                                     | 2 | 2.735 [2.7171(5)-2.7538(5)] | 2.746(4) [2.746(4)]       |
| Pd(7)-Pd(9)                                                     | 1 | 2.7061(4)                   | 2.728(5)                  |
| Mean [Range] for Pd-Pd                                          |   | 2.737 [2.7061(4)-7625(5)]   | 2.750 [2.728(5)-2.765(4)] |
|                                                                 |   |                             |                           |
| In $Pd_5$ trigonal bipyramid                                    |   |                             |                           |
| Pd(8)-Pd(8A)                                                    | 1 | 2.8451(4)                   | 2.858(2)                  |
| Pd(8)-Pd(9)                                                     | 2 | 2.717 [2.7066(5)-2.7281(5)] | 2.727(3) [2.727(3)]       |

|                                       |   |                              |                           |
|---------------------------------------|---|------------------------------|---------------------------|
| Mean [Range] for Pd-Pd                |   | 2.760 [2.7066(5)-2.8451(4)]  | 2.771 [2.727(3)-2.858(2)] |
| Mean [Range] for Pd-P                 |   | 2.33 [2.2863(11)-2.3550(15)] | 2.34 [2.28(2)-2.39(1)]    |
| Mean [Range] for Pd-C for $\mu_2$ -CO |   | 2.06 [1.978(6)-2.142(6)]     | 2.02 [1.98(3)-2.06(3)]    |
| Mean [Range] for C-O in $\mu_2$ -CO   | 2 | 1.16 [1.148(7)-1.170(7)]     | 1.26 [1.26(4)]            |
| Mean [Range] for Pd-C for $\mu_3$ -CO |   | 2.13 [2.014(5)-2.314(7)]     | 2.13 [1.98(5)-2.22(4)]    |
| Mean [Range] for C-O in $\mu_3$ -CO   |   | 1.18 [1.159(5)-1.186(7)]     | 1.18 [1.13(5)-1.23(5)]    |

<sup>a</sup> Data are taken from the crystal structure deposited in CCDC, refcode YUXFEC (R. C. B. Copley, C. M. Hill and D. M. P. Mingos, *J. Cluster Sci.*, 1995, **6**, 71); <sup>b</sup> denotes the total number of individual connectivities under *pseudo*- $C_s$  symmetry; <sup>c</sup> crystallographic analysis of the acetone-solvated crystal structure of  $[Ti_2Pd_{14}(CO)_9(PMe_3)_{11}][PF_6]_2$  (**1a-Me**) under centrosymmetric monoclinic symmetry ( $P2_1/n$ ) with  $Z=4$  required the determination of atomic parameters for one independent dication, two independent  $[PF_6]^-$  anions, and one independent solvated  $Me_2CO$  molecule. The entire  $[Ti_2Pd_{14}(CO)_9(PMe_3)_{11}]^{2+}$  dication (without Me substituents) possesses *pseudo* mirror-plane symmetry; <sup>d</sup> in the reported unsolvated crystal structure of **1-Me**, which has a centrosymmetric orthorhombic unit cell ( $Pmcn$ ) with  $Z=4$ , four dications and eight  $[PF_6]^-$  anions each lie on a crystallographic mirror plane that corresponds to the crystallographically independent unit being composed of one-half dication and two one-half  $[PF_6]^-$  anions; <sup>e</sup> in **1a-Me** one of the two  $[PF_6]^-$  anions and the nine methyl substituents of three  $PMe_3$  ligands are crystallographically disordered, whereas in **1-Me** both the cluster dication and two  $[PF_6]^-$  anions are ordered.

**Table S2.** Interatomic Angles ( $^{\circ}$ ) about Tl Atoms in  $[\text{Tl}_2\text{Pd}_{14}(\mu_2\text{-CO})_2(\mu_3\text{-CO})_7(\text{PMe}_3)_{11}][\text{PF}_6]_2 \cdot \text{Me}_2\text{CO}$  [(**1a-Me**)·**Me<sub>2</sub>CO**] and the non-Solvated  $[\text{Au}_2\text{Pd}_{14}(\text{CO})_9(\text{PMe}_3)_{11}][\text{PF}_6]_2$  (**1-Me**)<sup>a</sup> Relabeled as  $[\text{Tl}_2\text{Pd}_{14}(\text{CO})_9(\text{PMe}_3)_{11}][\text{PF}_6]_2$ .

| Angle           | N <sup>b</sup> | Mean [Range] in ( <b>1a-Me</b> )· <b>Me<sub>2</sub>CO</b> | Mean [Range] in <b>1-Me</b> <sup>a</sup> |
|-----------------|----------------|-----------------------------------------------------------|------------------------------------------|
| Pd(3)-Tl-Pd(4)  | 2              | 61.72(2) [61.722(14)-61.724(13)]                          | 61.38(7)                                 |
| Pd(3)-Tl-Pd(5)  | 2              | 61.05(2) [60.844(13)-61.250(13)]                          | 61.61(7)                                 |
| Pd(3)-Tl-Pd(6)  | 2              | 106.82(2) [106.651(12)-106.997(13)]                       | 106.34(7)                                |
| Pd(3)-Tl-Pd(7)  | 2              | 106.12(2) [106.061(13)-106.169(13)]                       | 106.47(7)                                |
| Pd(3)-Tl-Pd(8)  | 2              | 158.76(2) [158.122(15)-159.392(15)]                       | 158.73(8)                                |
| Pd(3)-Tl-Pd(10) | 2              | 58.25(2) [58.138(12)-58.359(12)]                          | 58.05(5)                                 |
| Pd(4)-Tl-Pd(5)  | 2              | 107.99(2) [107.771(14)-108.215(15)]                       | 108.11(8)                                |
| Pd(4)-Tl-Pd(6)  | 2              | 57.30(2) [57.082(11)-57.517(11)]                          | 56.91(6)                                 |
| Pd(4)-Tl-Pd(7)  | 2              | 104.33(2) [104.154(12)-104.505(12)]                       | 103.93(7)                                |
| Pd(4)-Tl-Pd(8)  | 2              | 109.41(2) [109.366(14)-109.456(14)]                       | 108.74(7)                                |
| Pd(4)-Tl-Pd(10) | 2              | 57.21(1) [57.147(10)-57.275(10)]                          | 57.15(6)                                 |
| Pd(5)-Tl-Pd(6)  | 2              | 104.68(2) [104.651(12)-104.700(12)]                       | 104.69(7)                                |
| Pd(5)-Tl-Pd(7)  | 2              | 57.18(2) [57.037(11)-57.314(10)]                          | 57.43(6)                                 |
| Pd(5)-Tl-Pd(8)  | 2              | 108.29(2) [107.839(13)-108.733(13)]                       | 108.69(7)                                |
| Pd(5)-Tl-Pd(10) | 2              | 57.17(1) [56.998(10)-57.334(10)]                          | 57.14(6)                                 |
| Pd(6)-Tl-Pd(7)  | 2              | 58.58(1) [58.583(10)-58.585(10)]                          | 58.35(3)                                 |
| Pd(6)-Tl-Pd(8)  | 2              | 56.01(2) [55.910(10)-56.112(11)]                          | 55.85(4)                                 |
| Pd(6)-Tl-Pd(10) | 2              | 56.70(1) [56.688(10)-56.712(10)]                          | 56.75(3)                                 |
| Pd(7)-Tl-Pd(8)  | 2              | 55.50(1) [54.828(10)-56.181(10)]                          | 55.64(5)                                 |
| Pd(7)-Tl-Pd(10) | 2              | 56.27(1) [56.247(10)-56.295(10)]                          | 56.31(3)                                 |
| Pd(8)-Tl-Pd(10) | 2              | 100.53(2) [100.024(12)-101.044(12)]                       | 100.68(6)                                |

<sup>a</sup> Data are taken from the crystal structure deposited in CCDC, refcode YUXFEC (R. C. B. Copley, C. M. Hill and D. M. P. Mingos, *J. Cluster Sci.*, 1995, **6**, 71); <sup>b</sup> denotes the total number of individual angles under *pseudo-C<sub>s</sub>* symmetry in (**1a-Me**)·**Me<sub>2</sub>CO** and crystallographic-*C<sub>s</sub>* symmetry in unsolvated **1-Me** relabeled as unsolvated (**1a-Me**).



**Table S3.** Comparative Means (Å) and Individual Ranges (Å) for Connectivities and Angles (°) under *Pseudo-C<sub>3v</sub>* Symmetry between the  $\text{TiPd}_9(\text{CO})_9\text{P}_6$  Fragment of  $[\text{TiPd}_9(\mu_2\text{-CO})_6(\mu_3\text{-CO})_3(\text{PPh}_3)_6][\text{PF}_6] \cdot 1.65\text{THF} \cdot 0.66\text{CH}_2\text{Cl}_2$  (**2a-Ph**) and the Corresponding Fragment of Crystallographically Isomorphous  $[\text{TiPd}_9(\mu_2\text{-CO})_6(\mu_3\text{-CO})_3(\text{PPh}_3)_6][\text{PF}_6] \cdot 3\text{THF}$  Formulated Originally as  $[\text{AuPd}_9(\mu_2\text{-CO})_6(\mu_3\text{-CO})_3(\text{PPh}_3)_6][\text{PF}_6] \cdot 3\text{THF}$  (**2-Ph**)<sup>a</sup>.

| Connectivity, Angle          | N <sup>b</sup> | Mean [Range] in <b>2a-Ph</b> |                    | Mean [Range] in <b>2-Ph</b> <sup>a</sup> |                     |
|------------------------------|----------------|------------------------------|--------------------|------------------------------------------|---------------------|
| Tl – Pd(A)                   | 3              | 2.83                         | 2.831(1)           | 2.84                                     | 2.837(1)            |
| Tl ... Pd(C)                 | 3              | 3.15                         | 3.147(1)           | 3.16                                     | 3.157(1)            |
| Pd(A) – Pd(C)                | 6              | 2.71                         | 2.684(1)-2.742(1)  | 2.72                                     | 2.687(1)-2.747(1)   |
| Pd(A) – Pd(A)                | 3              | 3.10                         | 3.097(1)           | 3.09                                     | 3.092(1)            |
| Pd(A) – Pd(B)                | 6              | 2.75                         | 2.746(1)-2.747(1)  | 2.75                                     | 2.748(1)-2.752(1)   |
| Pd(B) – Pd(B)                | 3              | 2.82                         | 2.822(1)           | 2.83                                     | 2.826(1)            |
| Pd(B) – P(B)                 | 3              | 2.33                         | 2.334(2)           | 2.34                                     | 2.337(2)            |
| Pd(C) – P(C)                 | 3              | 2.34                         | 2.336(2)           | 2.34                                     | 2.340(2)            |
| Pd(A) – (μ <sub>2</sub> -CO) | 6              | 2.13                         | 2.090(8)-2.172(8)  | 2.11                                     | 2.064(7)-2.154(8)   |
| Pd(C) – (μ <sub>2</sub> -CO) | 6              | 1.99                         | 1.991(7)-1.996(9)  | 2.02                                     | 2.018(8)-2.021(9)   |
| Pd(A) – (μ <sub>3</sub> -CO) | 3              | 2.45                         | 2.450(7)           | 2.45                                     | 2.454(7)            |
| Pd(B) – (μ <sub>3</sub> -CO) | 6              | 2.10                         | 2.091(7)-2.118(7)  | 2.10                                     | 2.079(8)-2.114(8)   |
| μ <sub>2</sub> -C – O        | 6              | 1.15                         | 1.151(10)-1.152(9) | 1.15                                     | 1.139(10)-1.153(10) |
| μ <sub>3</sub> -C – O        | 3              | 1.15                         | 1.150(9)           | 1.16                                     | 1.155(10)           |
| Tl-Pd(A)-Pd(C)               | 6              | 69.2                         | 68.75(2)-69.55(2)  | 69.2                                     | 68.83(2)-69.65(2)   |
| Pd(A)-Tl-Pd(A)               | 3              | 66.3                         | 66.31(2)           | 66.0                                     | 66.03(2)            |

<sup>a</sup> Data are taken from the crystal structure deposited in CCDC, refcode SOMGAD (C. Willocq, S. Hermans, M. Devillers, and B. Tinant, *Z. Kristallogr.*, 2008, **223**, 495); <sup>b</sup> denotes the total number of individual connectivities under *pseudo-C<sub>3v</sub>* symmetry.

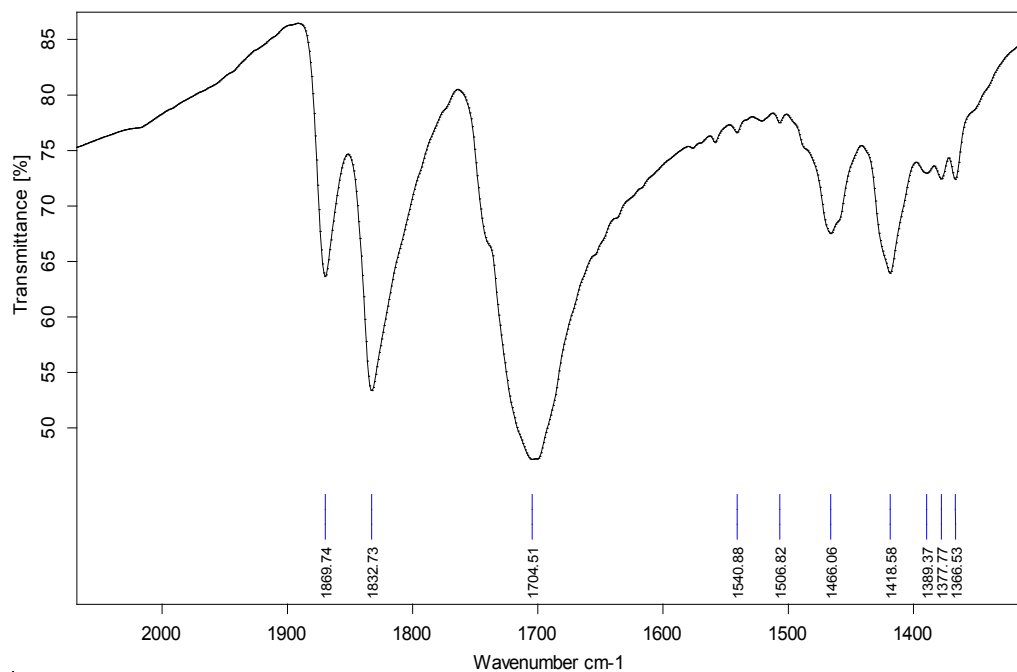

IR spectrum of  $[\text{Tl}_2\text{Pd}_{14}(\text{CO})_9(\text{PMe}_3)_{11}](\text{PF}_6)_2 \cdot \text{Me}_2\text{CO}$  in paratone.

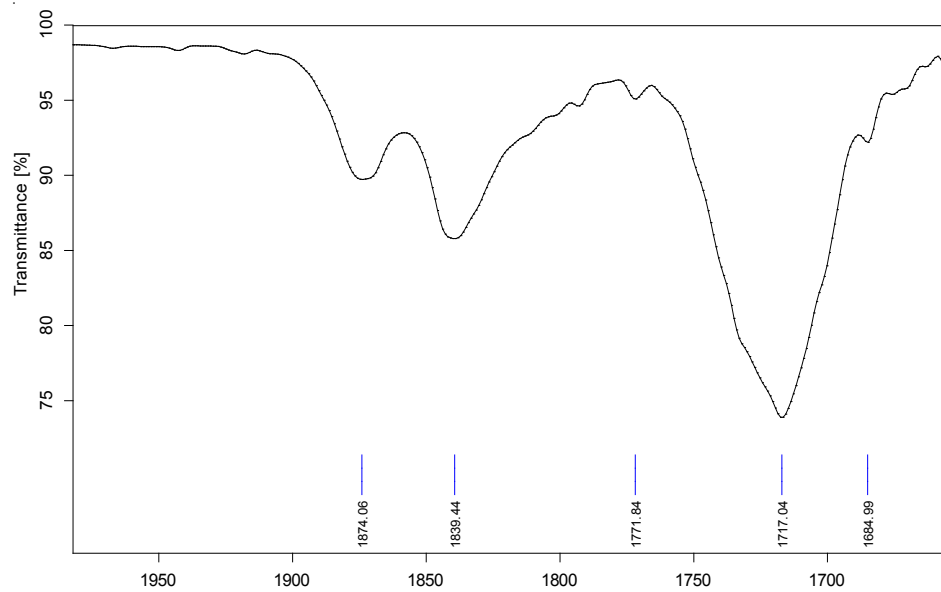

IR spectrum of  $[\text{Tl}_2\text{Pd}_{14}(\text{CO})_9(\text{PMe}_3)_{11}](\text{PF}_6)_2 \cdot \text{Me}_2\text{CO}$  in  $\text{CH}_2\text{Cl}_2$ .

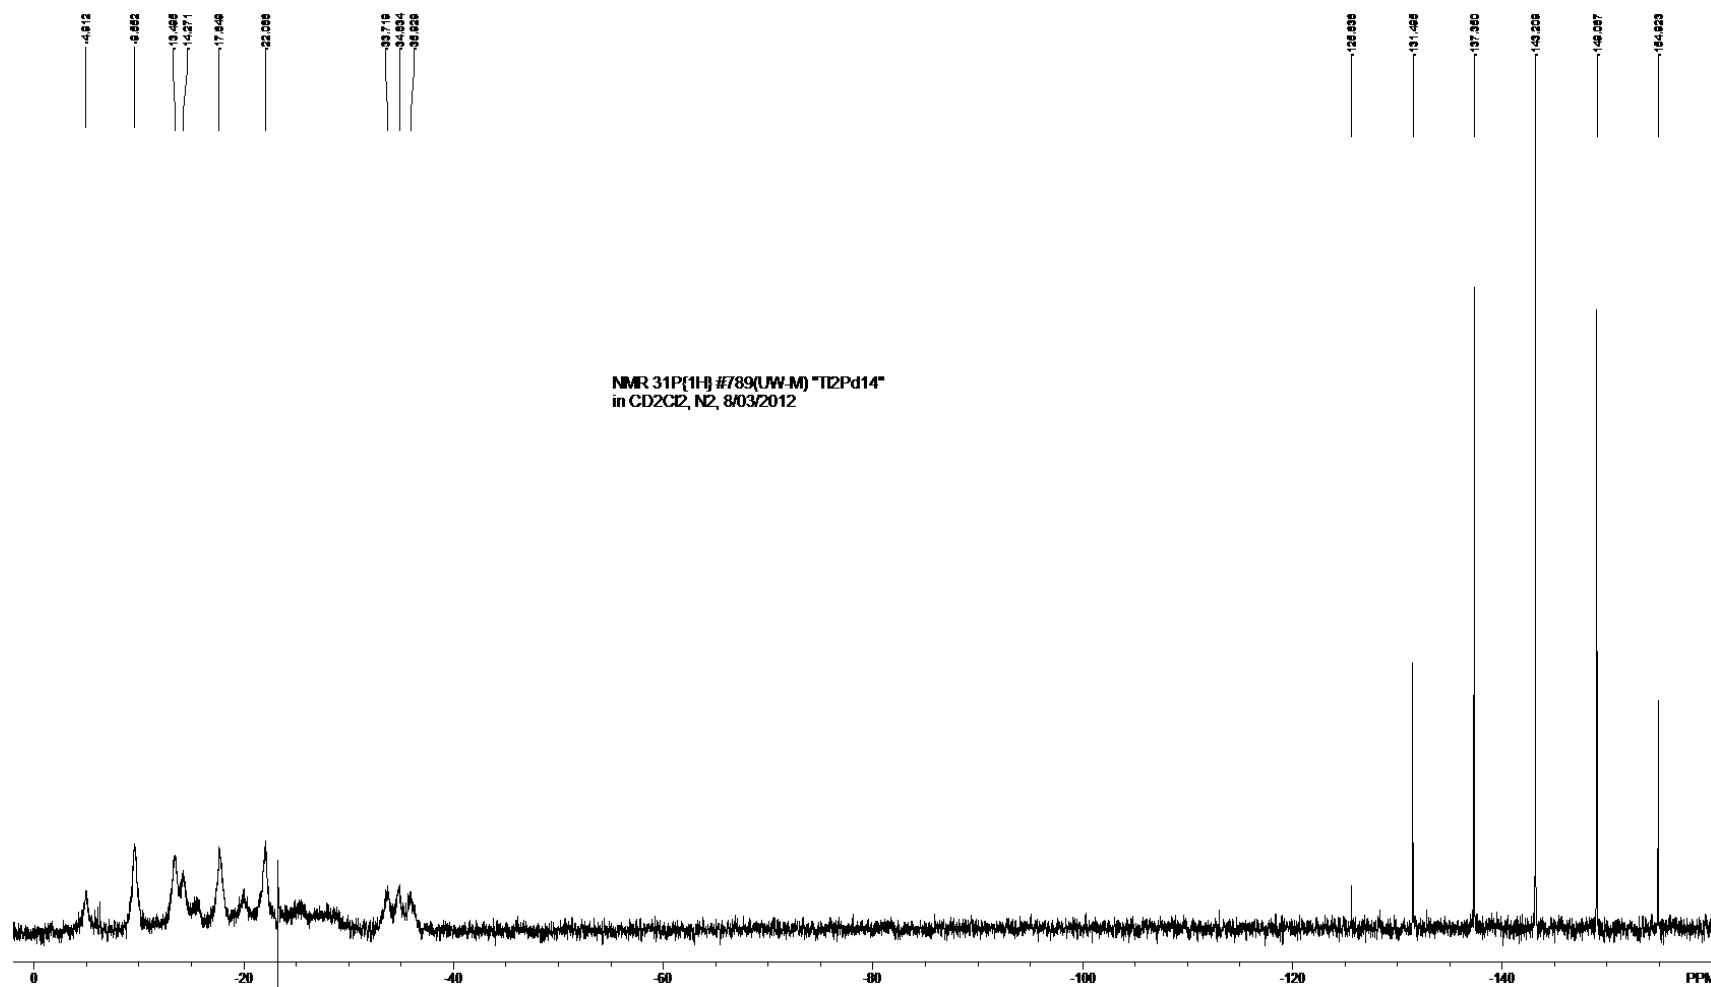

$^{31}\text{P}\{^1\text{H}\}$  NMR (121.386 MHz) spectrum of  $[\text{Ti}_2\text{Pd}_{14}(\text{CO})_9(\text{PMe}_3)_{11}](\text{PF}_6)_2 \cdot \text{Me}_2\text{CO}$  in  $\text{CD}_2\text{Cl}_2$ .

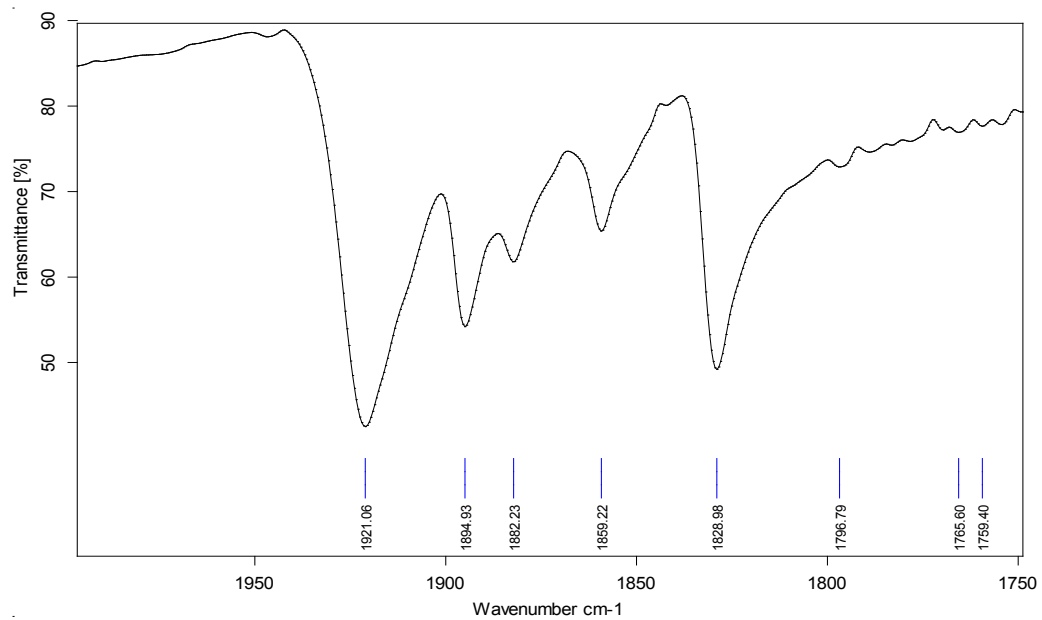

IR spectrum of  $[\text{TlPd}_9(\text{CO})_9(\text{PPh}_3)_6][\text{PF}_6]$  in paratone.

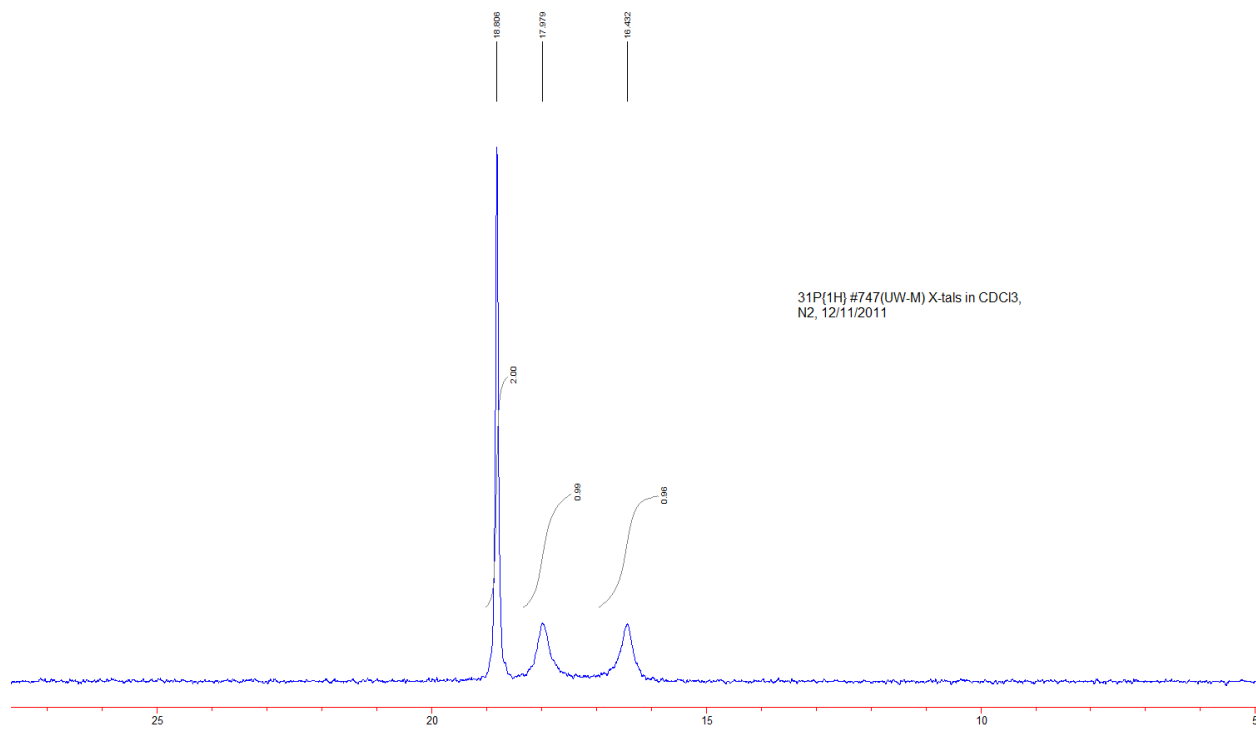

$^{31}\text{P}\{^1\text{H}\}$  NMR (121.386 MHz) spectrum of  $[\text{TlPd}_9(\text{CO})_9(\text{PPh}_3)_6][\text{PF}_6]$  in  $\text{CDCl}_3$ .
